# Supplementary material for: Predictive context biases binocular rivalry in children and adults with no positive relation to two measures of social cognition
Source: PubMed Central journal article supplement (PMC7005192; doi:10.1038/s41598-020-58921-8), 2020-02-06
Supplement: 41598_2020_58921_MOESM1_ESM.pdf [file 41598_2020_58921_MOESM1_ESM.pdf]

Supplementary Information for the manuscript:

Valuch, C. & Kulke, L. (2020). Predictive context biases binocular rivalry in children and adults with no positive relation to two measures of social cognition.

| Modeled effects               | $\beta$ | SE   | t     | P       |
|-------------------------------|---------|------|-------|---------|
| (Intercept)                   | 61.81   | 1.08 | 57.23 | < 0.001 |
| <i>Significant effects</i>    |         |      |       |         |
| RME                           | -2.97   | 1.19 | -2.50 | 0.014   |
| <i>Nonsignificant effects</i> |         |      |       |         |
| Group                         | -1.88   | 1.72 | -1.09 | 0.279   |
| Group $\times$ SST ToM        | 1.98    | 2.29 | 0.86  | 0.390   |
| Eye imbalance                 | -0.83   | 1.10 | -0.75 | 0.455   |
| Group $\times$ Eye imbalance  | -1.27   | 1.83 | -0.69 | 0.490   |
| Group $\times$ RME            | 1.39    | 2.01 | 0.69  | 0.493   |
| SST ToM                       | -0.91   | 1.38 | -0.66 | 0.511   |
| Group $\times$ SST Physical   | -1.26   | 2.20 | -0.57 | 0.568   |
| SST Physical                  | 0.72    | 1.38 | 0.52  | 0.604   |

**Table S1.** Fixed effects estimates from a linear model with the continuous outcome variable “Initial percept matching predictive context (% trials)”. Reference age group: Adults. Effects ordered according to t value from largest to smallest. Model formula: Percent\_Matching ~ Group\*Eye\_Imbalance + Group\*RME + Group\*SST\_ToM + Group\*SST\_Physical. Continuous predictor variables were Z-scaled within groups.
